# Supplementary material for: Establishment of reference measurement procedure and reference material for Treponema pallidum
Source: Royal Society of Chemistry journal article supplement (doi:10.1039/d3ay01906c), 2024-01-01
Supplement: d3ay01906c1.pdf [file d3ay01906c1.pdf]

# Supplemental information

## Establishment of reference measurement procedure and reference material for *Treponema pallidum*

Yanmin Lin,<sup>a,b</sup> Jiayi Yang,<sup>b</sup> Xia Wang,<sup>b</sup> Jingya Yang,<sup>a,c\*</sup> Lianhua Dong<sup>b\*</sup>

<sup>a</sup> College of Food Science and Technology, Shanghai Ocean University, 201306, Shanghai, P.R.China

<sup>b</sup> Center for Advanced Measurement of Science, National Institute of Metrology, 100029, Beijing, P.R.China

<sup>c</sup> Marine Biomedical Science and Technology Innovation Platform of Lin-gang Special Area, 201306, Shanghai, P.R.China

Corresponding author: 1) Lianhua Dong, Tel: 86-10-64524959, FAX: 86-10-64524959, E-mail: donglh@nim.ac.cn.

2) Jingya Yang, Tel: 86-21-61900387, FAX: 86-21-61900365, E-mail: jyyang@shou.edu.cn.

## Supplemental Tables

**Table S1** Quantitative results in a serial dilution in duplex dPCR format

| Method A (copies/reaction) |                      |        | Method B (copies/reaction) |                      |        |
|----------------------------|----------------------|--------|----------------------------|----------------------|--------|
| Input concentration        | Output concentration | CV     | Input concentration        | Output concentration | CV     |
| $2.82 \times 10^4$         | $2.85 \times 10^4$   | 2.29%  | $2.81 \times 10^4$         | $2.85 \times 10^4$   | 2.16%  |
| 2816.81                    | 2816.81              | 4.53%  | 2809.03                    | 2809.03              | 4.50%  |
| 280.65                     | 263.19               | 4.69%  | 279.88                     | 261.95               | 5.12%  |
| 57.05                      | 62.19                | 20.33% | 56.89                      | 61.75                | 20.04% |
| 11.49                      | 9.17                 | 59.31% | 11.46                      | 8.73                 | 38.24% |
| 2.28                       | 1.47                 | 77.82% | 2.27                       | 1.47                 | 77.82% |

**Table S2** The 15 highest values for blank values of duplex assay (copies/reaction)

| No. | Method A | Method B |
|-----|----------|----------|
| 60  | 2.64     | 2.64     |
| 59  | 2.64     | 2.64     |
| 58  | 2.64     | 2.64     |
| 57  | 2.42     | 2.64     |
| 56  | 2.42     | 2.64     |
| 55  | 2.42     | 2.64     |
| 54  | 2.42     | 2.64     |
| 53  | 2.42     | 2.20     |
| 52  | 2.20     | 2.20     |
| 51  | 2.20     | 2.20     |
| 50  | 2.20     | 2.20     |
| 49  | 2.20     | 2.20     |
| 48  | 2.20     | 1.98     |
| 47  | 2.20     | 1.76     |
| 46  | 1.98     | 1.32     |

**Table S3** Homogeneity assessment

| Unit          | Method A (copies/ $\mu$ L)                            |                    | Method B (copies/ $\mu$ L) |                    |
|---------------|-------------------------------------------------------|--------------------|----------------------------|--------------------|
|               | Repeat 1                                              | Repeat 2           | Repeat 1                   | Repeat 2           |
| 1             | $2.27 \times 10^6$                                    | $2.57 \times 10^6$ | $2.30 \times 10^6$         | $2.59 \times 10^6$ |
| 2             | $2.33 \times 10^6$                                    | $2.28 \times 10^6$ | $2.32 \times 10^6$         | $2.28 \times 10^6$ |
| 3             | $2.07 \times 10^6$                                    | $2.14 \times 10^6$ | $2.07 \times 10^6$         | $2.14 \times 10^6$ |
| 4             | $2.13 \times 10^6$                                    | $2.24 \times 10^6$ | $2.13 \times 10^6$         | $2.24 \times 10^6$ |
| 5             | $2.21 \times 10^6$                                    | $2.10 \times 10^6$ | $2.22 \times 10^6$         | $2.10 \times 10^6$ |
| 6             | $2.26 \times 10^6$                                    | $2.19 \times 10^6$ | $2.27 \times 10^6$         | $2.19 \times 10^6$ |
| 7             | $2.15 \times 10^6$                                    | $2.35 \times 10^6$ | $2.15 \times 10^6$         | $2.36 \times 10^6$ |
| 8             | $2.17 \times 10^6$                                    | $2.20 \times 10^6$ | $2.16 \times 10^6$         | $2.21 \times 10^6$ |
| 9             | $2.29 \times 10^6$                                    | $2.38 \times 10^6$ | $2.29 \times 10^6$         | $2.38 \times 10^6$ |
| 10            | $2.29 \times 10^6$                                    | $2.35 \times 10^6$ | $2.28 \times 10^6$         | $2.35 \times 10^6$ |
| 11            | $2.15 \times 10^6$                                    | $2.24 \times 10^6$ | $2.15 \times 10^6$         | $2.25 \times 10^6$ |
| $Q_1$         | $1.69 \times 10^{11}$                                 |                    | $1.89 \times 10^{11}$      |                    |
| $Q_2$         | $9.70 \times 10^{10}$                                 |                    | $9.68 \times 10^{10}$      |                    |
| $v_1$         | 10                                                    |                    | 10                         |                    |
| $v_2$         | 11                                                    |                    | 11                         |                    |
| $F$           | 1.92                                                  |                    | 2.15                       |                    |
| $F_{(10,11)}$ | 2.85                                                  |                    | 2.85                       |                    |
| Conclusion    | $F < F_{(10,11)}$ , reference material is homogeneous |                    |                            |                    |

**Table S4** Components of the uncertainty

| Components                             | Values             |
|----------------------------------------|--------------------|
| $u_1$                                  | 2.95%              |
| $u_2$                                  | 1.93%              |
| $u_3$                                  | 3.44%              |
| $u_c^2$                                | 0.24%              |
| $u_c$                                  | 4.92%              |
| $U = u_c \times k$ ( $k=2$ )           | 9.9%               |
| Reference values (copies/ $\mu$ L)     | $2.21 \times 10^6$ |
| extended uncertainty (copies/ $\mu$ L) | $0.22 \times 10^6$ |

**Notes:**  $u_1$  Assignment values.  $u_2$  Homogeneity.  $u_3$  Stability in long-term storage.  $u_c$  Combined uncertainty.

Four wells were randomly selected from each of two different droplet reaction plates. Droplets were photographed under a microscope (Olympus, BX51) after generation. Four separate images containing at least 25 complete droplets were captured for each well (Fig. S2) and droplet volumes were estimated by using the ImageJ software (1.48V, ImageJ). Finally, the average of the total droplet volumes for each well and its uncertainty were calculated (Table S5).

**Table S5** Uncertainty in the partition volume of the Sniper platform (nL)

|           | Plate 1 | Plate 2 |
|-----------|---------|---------|
| Well 1    | 0.82    | 0.78    |
|           | 0.73    | 0.77    |
|           | 0.79    | 0.83    |
|           | 0.78    | 0.79    |
| Well 2    | 0.76    | 0.78    |
|           | 0.74    | 0.77    |
|           | 0.69    | 0.82    |
|           | 0.81    | 0.75    |
| Well 3    | 0.80    | 0.78    |
|           | 0.79    | 0.77    |
|           | 0.75    | 0.78    |
|           | 0.73    | 0.77    |
| Well 4    | 0.79    | 0.73    |
|           | 0.78    | 0.77    |
|           | 0.81    | 0.77    |
|           | 0.77    | 0.81    |
| Mean      | 0.78    |         |
| SD        | 0.03    |         |
| $u_{rel}$ | 1.71%   |         |

Note :

$$u_{droplet\ volume\ rel} = \sqrt{u_{droplet\ volume}^2 + u_{effects\ of\ the\ facal\ plane}^2 + u_{microscope\ calibration}^2 + u_{micrometer}^2}$$

The uncertainty of the droplet volume was 0.68%. The effects of the facal plane was 0.15%, the microscope calibration was 1.56%, the micrometer was 0.15%.<sup>1</sup> The relative uncertainty of the droplet volume was calculated to be 1.71%.

## Supplemental Figures

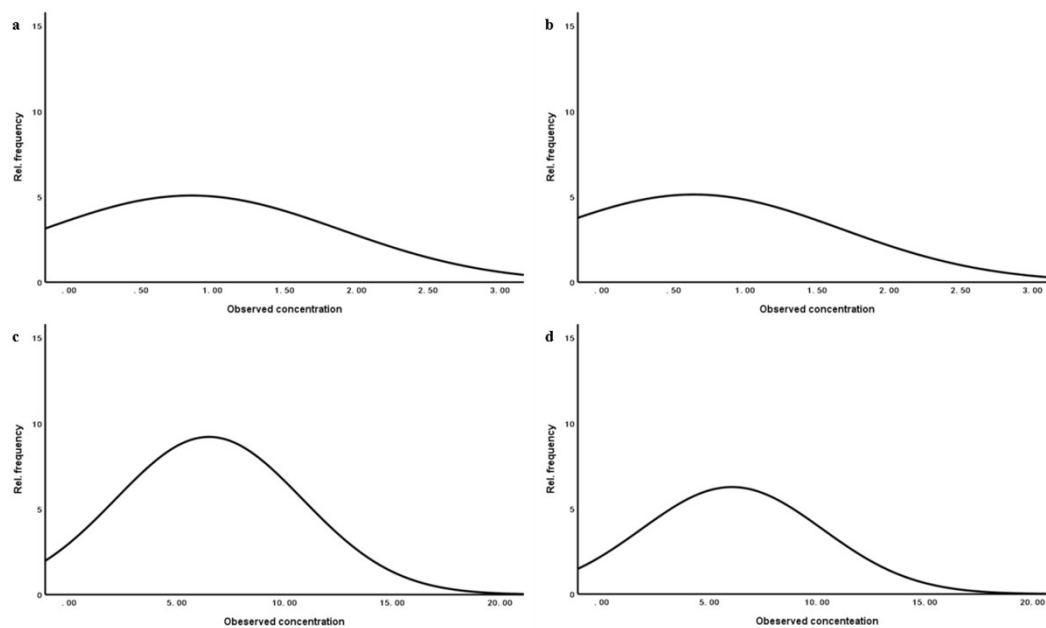

**Fig S1** Distribution of the results of 60 measurements for limit of blank (LoB) and limit of detection (LoD). **a** 60 measurements of the LoB for Method A. **b** 60 measurements of the LoB for Method B. **c** 60 measurements of the LoD for Method A. **d** 60 measurements of the LoD for Method B. The assay results for both LoB and LoD were non-Gaussian distributed

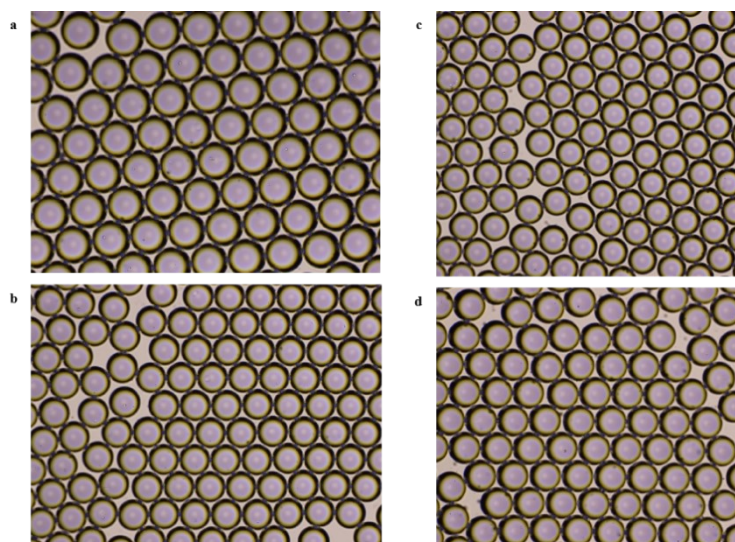

**Figure S2** Droplets generated from Sniper DQ24 digital PCR as scanned by Olympus microscope with a 10 $\times$  field lens.

## Reference

1. L. Dong, Y. Meng, Z. Sui, J. Wang, L. Wu and B. Fu, *Scientific reports*, 2015, **5**, 13174.
